# Supplementary material
Source: PubMed Central journal article supplement (PMC9872607)
Supplement: aac.01294-22-s0001.pdf [file aac.01294-22-s0001.pdf]

1 **Supplementary Material**

2  
3 cAMP-mediated inhibition of cholesterol catabolism in *Mycobacterium tuberculosis* by a novel  
4 drug candidate GSK2556286

5  
6 Kirstin L. Brown<sup>\*,‡</sup>, Kaley M. Wilburn<sup>\*,‡</sup>, Christine R. Montague<sup>‡</sup>, Jason C. Grigg<sup>‡</sup>, Olalla Sanz<sup>#</sup>,  
7 Esther Pérez-Herrán<sup>#</sup>, David Barros<sup>#</sup>, Lluís Ballell<sup>#</sup>, Brian C. VanderVen<sup>‡,¶</sup>, Lindsay D. Eltis<sup>‡,¶</sup>

8  
9 <sup>‡</sup>*Microbiology and Immunology, The Life Sciences Institute, The University of British Columbia,*  
10 *Vancouver, Canada, V6T 1Z3,* <sup>‡</sup>*Microbiology and Immunology, Cornell University, Ithaca, New*  
11 *York, United States of America and* <sup>#</sup>*Diseases of the Developing World, GlaxoSmithKline R1D*  
12 *Limited, Tres Cantos, Madrid, Spain.*

13  
14 **Running title:** cAMP-mediated inhibition of *Mycobacterium tuberculosis*

15  
16 \*These two authors contributed equally to this work.

17 <sup>¶</sup>To whom correspondence should be addressed: [bcv8@cornell.edu](mailto:bcv8@cornell.edu), [leltis@mail.ubc.ca](mailto:leltis@mail.ubc.ca)

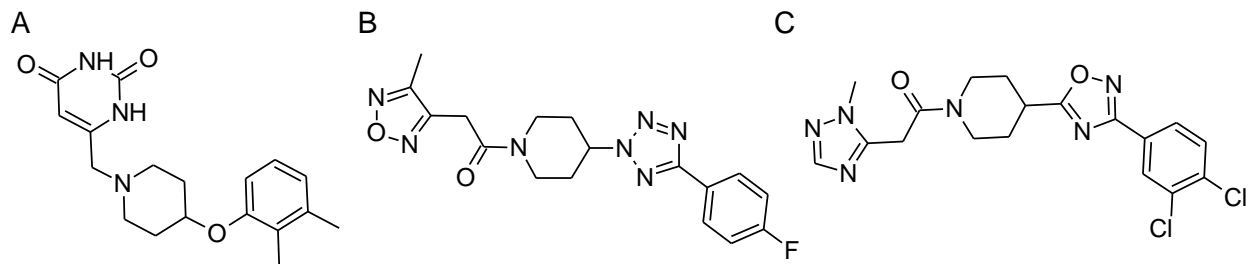

22

23 **Supplementary Figure S1. Structures of Mtb inhibitors used in the study. (A) GSK286 (B) V-59 and**

24 **(C) mCLB073.**

25

26

27

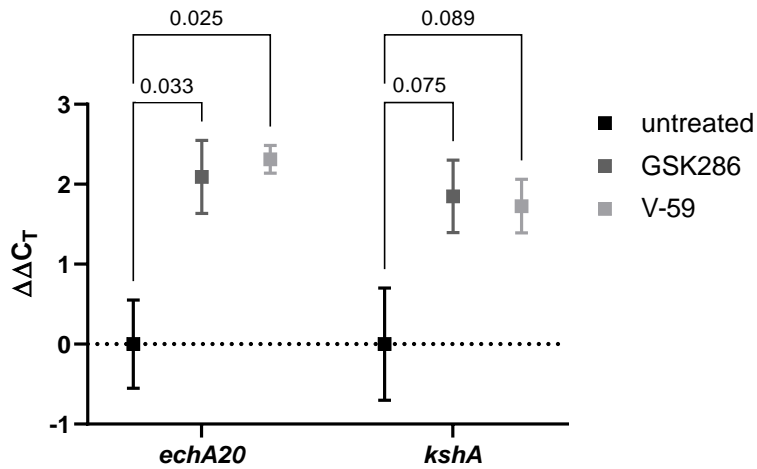

28

29 **Supplementary Figure S2. Effect of GSK286 on levels of cholesterol gene transcripts.** Mtb was grown  
 30 on the cholesterol media supplemented with 10 μM GSK286 (dark grey), 10 μM V-59 (light grey) or no  
 31 additional compound (black). Transcript levels were determined using RT-qPCR and duplicate biological  
 32 replicates were normalized to levels of the *sigA* transcript. Statistical analysis was performed using one-  
 33 way ANOVA and Tukey's multiple comparison test with adjusted P-values indicated.

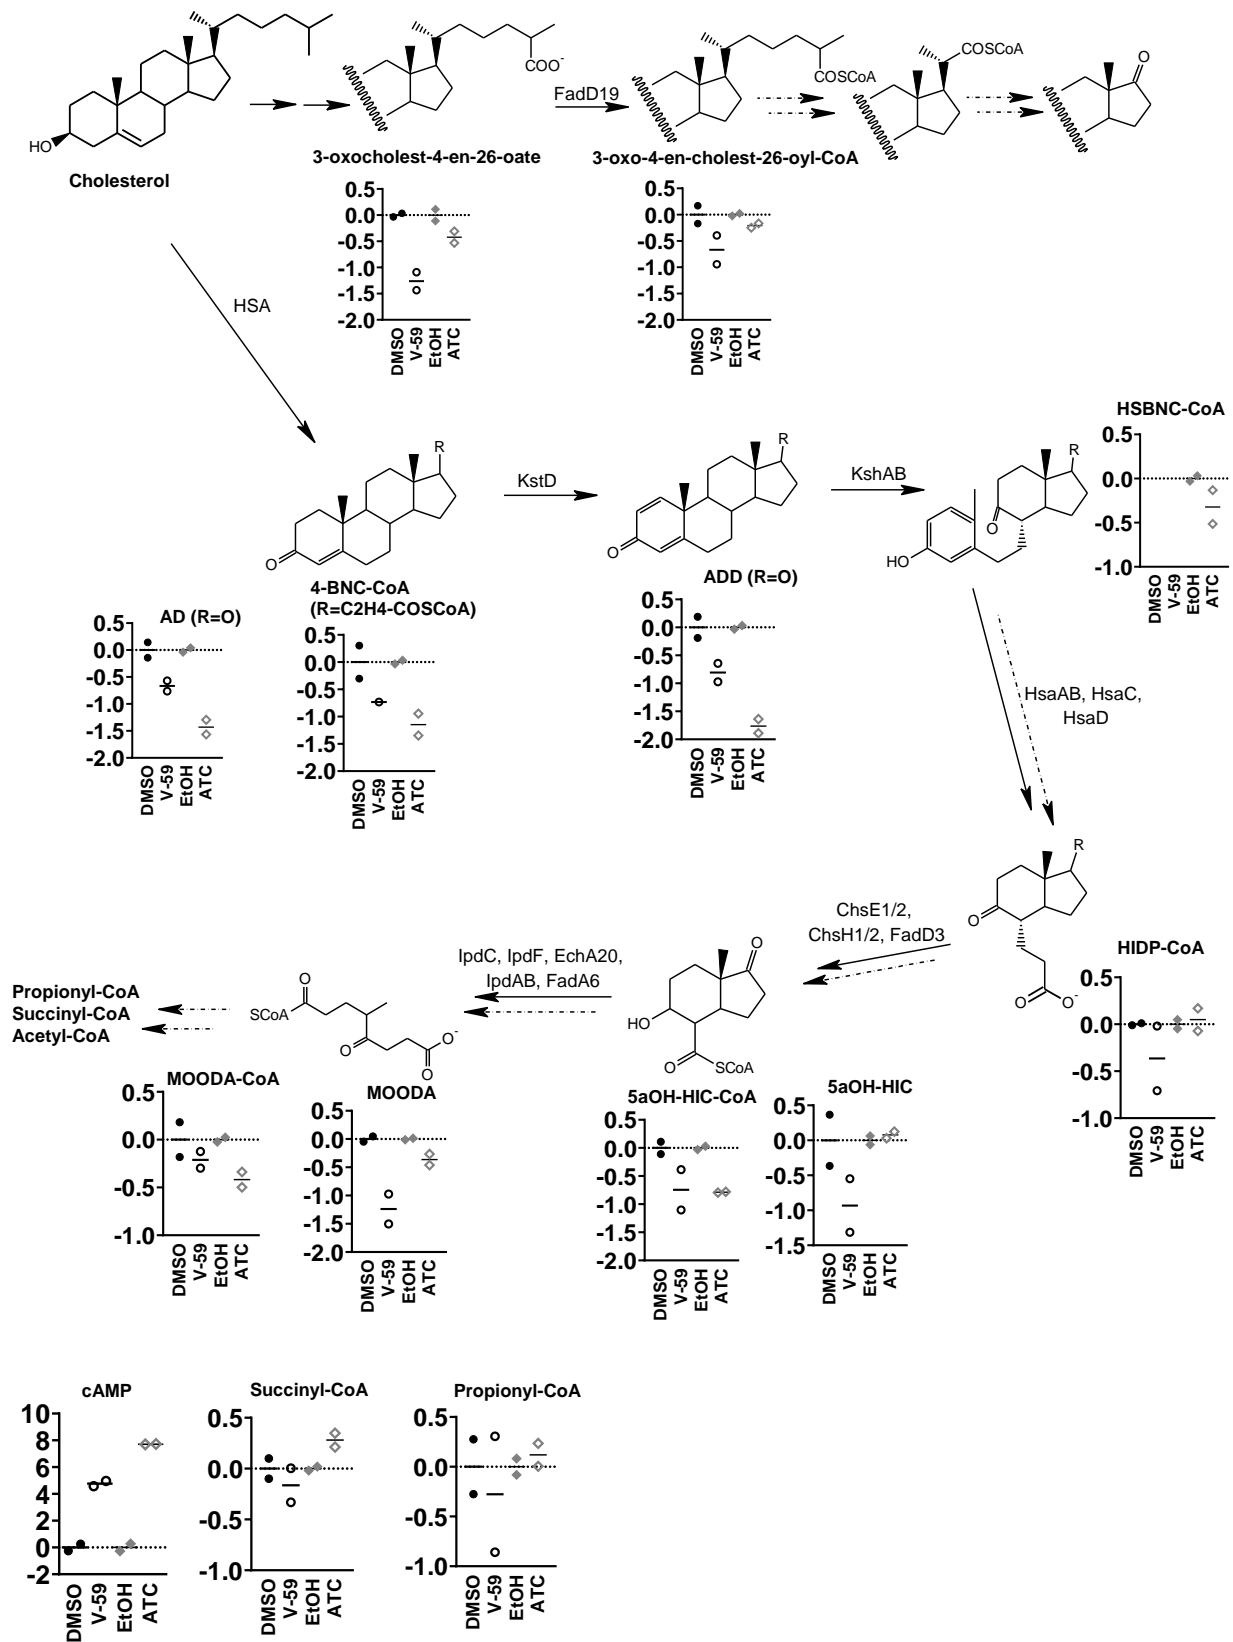

34

35 **Supplementary Figure S3.**

36 **Supplementary Figure S3. LC-MS analysis of cholesterol degradation products.** Extracts from cell  
37 pellets for DMSO-treated control cells (solid black circle), V-59-treated (dissolved in DMSO, open black  
38 circle), ethanol-treated control (solid grey diamond), and Atc-treated TetOn-cAMP (dissolved in ethanol,  
39 open grey diamond) after 48 hrs of treatment. Untargeted molecular feature extractions were performed,  
40 and data were normalized using total ion abundance from features present in all samples. Cholesterol  
41 degradation intermediates were identified in the normalized data by  $m/z$  ( $< 15$  ppm error) and retention time  
42 matches to standards. Identified cholesterol metabolites are indicated by chemical structures and shorthand  
43 labels on a simplified cholesterol degradation schematic. Arrows represent enzyme catalyzed reactions,  
44 with one or two arrows representing one or multiple steps in the degradation pathway and known enzymes  
45 are indicated above the reaction arrow. Relative compound abundance is indicated as  $\text{Log}_2$  fold-change in  
46 compound abundance relative to their respective DMSO (for V-59) and ethanol (for ATC treated) controls  
47 are shown on the Y-axis. Experiments were performed in duplicate with individual samples shown as points  
48 and the horizontal line representing the median. The symbol “nd” indicates the compound was not identified  
49 in the sample. Additionally, cAMP was identified in these samples indicating a  $>50$ -fold change in cAMP  
50 levels, as previously determined. Of the final products of cholesterol degradation, only propionyl- and  
51 succinyl-CoA were identified, though they are consumed and produced in many other cellular processes.  
52 AD: androst-4-ene-3,17-dione, 4-BNC-CoA: 3-oxo-4-pregnene-20-carboxyl-CoA, ADD: androsta-1,4-  
53 diene-3,17-dione, HSBNC-CoA: 3-Hydroxy-9-oxo-9,10-seco-23,24-bisnorchola-1,3,5(10)-trien-22-oyl-  
54 CoA, HIDP-CoA:  $3\alpha$ -H-4 $\alpha$ (3'-propanoate)-7 $\beta$ -methylhexahydro-5-indanone-1-propionyl-CoA, 5aOH-  
55 HIC: 3-[(3 $\alpha$ S,4S, 5R,7 $\alpha$ S)-5-hydroxy-7 $\alpha$ -methyl-1-oxo-octahydro-1H-indene-4-carboxylate, 5aOH-HIC-  
56 CoA: 3-[(3 $\alpha$ S,4S, 5R,7 $\alpha$ S)-5-hydroxy-7 $\alpha$ -methyl-1-oxo-octahydro-1H-indene-4-carboxyl-CoA, MOODA:  
57 4-methyl-5-oxo-octanedioate, MOODA-CoA: 7-carboxy-4-methyl-5-oxoheptanoyl-CoA.  
58

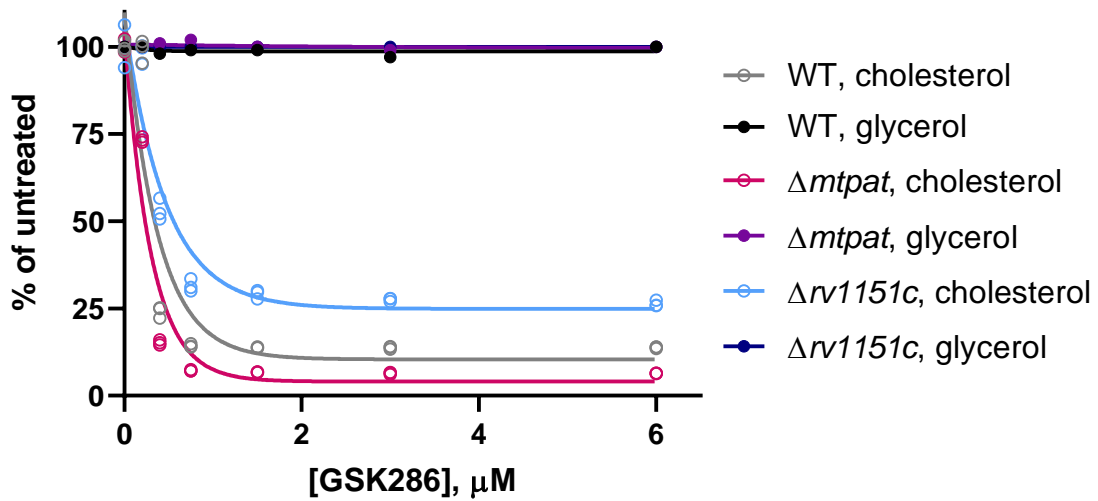

59

60 **Supplementary Figure S4. Sensitivity of  $\Delta mtpat$  and  $\Delta rv1151c$  Mtb Erdman to GSK286.** WT and  
 61 mutant strains were grown in 7H9 medium supplemented with 0.2% glycerol or 0.5 mM cholesterol in 96-  
 62 well plates with increasing concentrations of GSK286 (in DMSO) or DMSO alone. Cells were incubated  
 63 for 7 days at 37°C, and then the resazurin assay was performed. Resazurin signals for GSK286 treated  
 64 samples are shown after normalizing to the resazurin signal for the corresponding strain and growth media  
 65 treated with DMSO alone (untreated). Data represent the mean of biological triplicates for glycerol controls  
 66 (filled circles) and individual triplicate data points are shown for cholesterol-grown strains (open circles).

67

68 **TABLES**

69

70 **Supplementary Table 1.** Bacterial strains used in this study.

| <b>Species</b>         | <b>Strain</b> | <b>Modification</b> | <b>Antibiotic resistance<sup>a</sup></b> | <b>Source</b> |
|------------------------|---------------|---------------------|------------------------------------------|---------------|
| <i>M. tuberculosis</i> | Erdman        | -                   | -                                        |               |
| <i>M. tuberculosis</i> | Erdman        | $\Delta rv1625c$    | Hyg                                      | This study    |
| <i>M. tuberculosis</i> | Erdman        | $\Delta mtpat$      | Kan, Hyg                                 | This study    |
| <i>M. tuberculosis</i> | Erdman        | $\Delta rv1151c$    | Kan, Hyg                                 | This study    |
| <i>M. tuberculosis</i> | CDC1551       | -                   | -                                        |               |
| <i>M. tuberculosis</i> | CDC1551       | Tn:: <i>rv1625c</i> | Kan                                      | (1)           |
| <i>R. jostii</i>       | RHA1          | -                   |                                          |               |

71 <sup>a</sup>Kan, kanamycin; Hyg, hygromycin

72

73

74 **Supplementary Table 2.** Plasmids used in this study.

| Name               | Description <sup>a</sup>                                                                                                                                                 | Reference  |
|--------------------|--------------------------------------------------------------------------------------------------------------------------------------------------------------------------|------------|
| pTipQC2            | <i>Rhodococcus</i> expression vector, Thiostrepton-inducible promoter, Cam <sup>R</sup> , Amp <sup>R</sup>                                                               | (2)        |
| pTip1625           | <i>rv1625c</i> cloned into pTipQC2 with a C-terminal His-tag, Cam <sup>R</sup> , Amp <sup>R</sup>                                                                        | This study |
| pYUB854            | Plasmid for generating recombineering constructs. Hyg <sup>R</sup>                                                                                                       | (3)        |
| pJV53              | Plasmid for recombineering in Mtb, Kan <sup>R</sup>                                                                                                                      | (3)        |
| pKO0998            | Up- and downstream regions of <i>rv0998</i> cloned on either side of the Hyg <sup>R</sup> cassette in pYUB854 for deleting <i>rv0998</i> in Mtb. Hyg <sup>R</sup>        | This study |
| pKO1151            | Up- and downstream regions of <i>rv1151</i> cloned on either side of the Hyg <sup>R</sup> cassette in pYUB854 for the deletion of <i>rv1151</i> in Mtb. Hyg <sup>R</sup> | This study |
| 2×Rv1625c          | <i>rv1625c</i> expressed from the hsp60 promoter in pMV306, Apr <sup>R</sup>                                                                                             | (1)        |
| <i>prpD'</i> ::GFP | Mycobacterial reporter vector, GFP expressed by the <i>prpD</i> promoter and mCherry expressed from the smyc promoter, Kan <sup>R</sup>                                  | (4)        |
| tetON-cAMP         | Catalytic domain of Rv1264 with C-terminal His-tag expressed from the Atc inducible promoter p606, Hyg <sup>R</sup>                                                      | (1)        |

75 <sup>a</sup>Amp, ampicillin; Cam, chloramphenicol; Apr, apramycin; Kan, kanamycin; Hyg, hygromycin

76

77



78 **Supplementary Table 3.** Oligonucleotides used in this study

| <b>Name</b> | <b>Sequence</b>                                                                 | <b>Restriction</b> |
|-------------|---------------------------------------------------------------------------------|--------------------|
| Rv1625-F    | GCTGAACCATATGGCGGCAAGAAAATGCGGC                                                 | <i>NdeI</i>        |
| Rv1625-R    | GGAATTCGTGATGGTGTGATGGTGTGACTAGTAGCGACCCCTGCCGTG<br>CGGGGTTTCGACCCCTGCCGTGCGGGG | <i>EcoRI</i>       |
| Rv0998up-F  | AAAGCTTCACGTGGTTCGACGGATCCGTTGGTAGCGCGACTCGTTTCGC                               | <i>HindIII</i>     |
| Rv0998up-R  | CGCCAATGACACCAGACCCTCG                                                          | -                  |
| Rv0998do-F  | CGAGGGTCTGGTGTTCATTGGCGACCATGATCGATGTGCCGGGTC                                   | -                  |
| Rv0998do-R  | TGACACTATAGAATACATAGGATCCGCGTCAGATGTACGACCGGGTG                                 | <i>BamHI</i>       |
| Rv1151up-F  | GTGATAAACTACCGCATTAAGCTTCAACCTGCGCACGCTGGCTAAG                                  | <i>HindIII</i>     |
| Rv1151up-R  | GTCGAATCGGGCCCACAATCC                                                           | -                  |
| Rv1151do-F  | GGATTGTGGGCCCCGATTTCGACAATCCCGAGCCCACGCCGTTG                                    | -                  |
| Rv1151do-R  | CTCACTATAGGGAGACCGGAAGCTTGCGTGTCCGACCTCATGCCTC                                  | <i>HindIII</i>     |

79

80

81 **References**

82

- 83 1. Wilburn KM, Montague CR, Qin B, Woods AK, Love MS, McNamara CW, Schultz PG,  
84 Southard TL, Huang L, Petrassi HM, VanderVen BC. 2022. Pharmacological and genetic  
85 activation of cAMP synthesis disrupts cholesterol utilization in *Mycobacterium tuberculosis*.  
86 PLoS Pathog 18:e1009862.
- 87 2. Nakashima N, Tamura T. 2004. Isolation and characterization of a rolling-circle-type  
88 plasmid from *Rhodococcus erythropolis* and application of the plasmid to multiple-  
89 recombinant-protein expression. Appl Environ Microbiol 70:5557-68.
- 90 3. van Kessel JC, Marinelli LJ, Hatfull GF. 2008. Recombineering mycobacteria and their  
91 phages. Nat Rev Microbiol 6:851-7.
- 92 4. Nazarova EV, Montague CR, La T, Wilburn KM, Sukumar N, Lee W, Caldwell S, Russell  
93 DG, VanderVen BC. 2017. Rv3723/LucA coordinates fatty acid and cholesterol uptake in  
94 *Mycobacterium tuberculosis*. Elife 6:e26969/1-22.

95
